# Supplementary figures and images for: Decoding the brain state-dependent relationship between pupil dynamics and resting state fMRI signal fluctuation
Source: eLife journal article supplement (doi:10.7554/elife.68980), 2021-08-31

A

Cluster 1

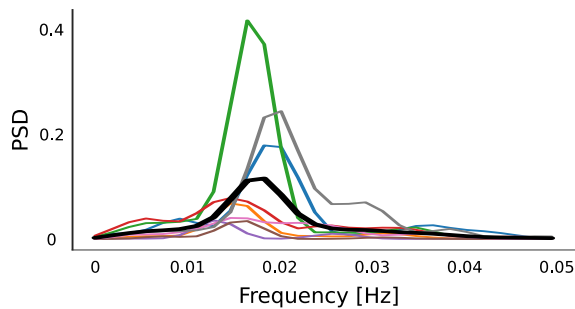

Cluster 2

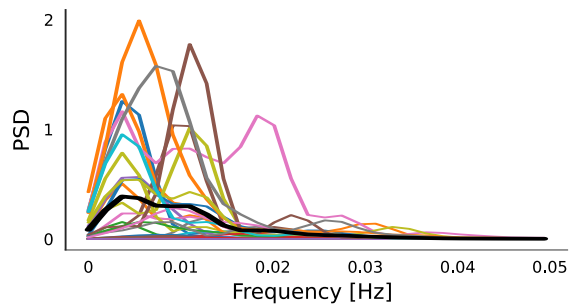

Cluster 3

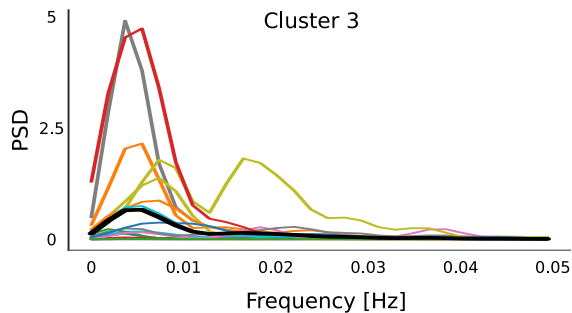

Cluster 4

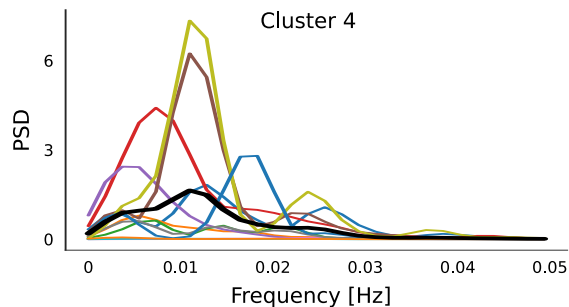

B

Cluster 1

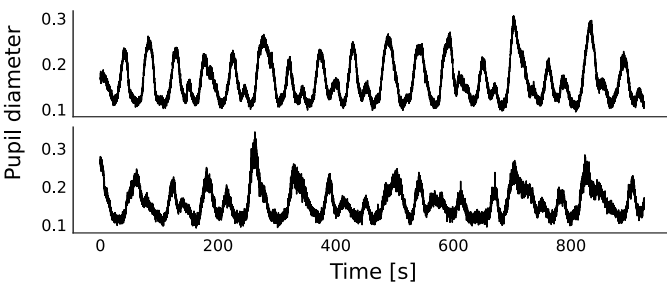

Cluster 2

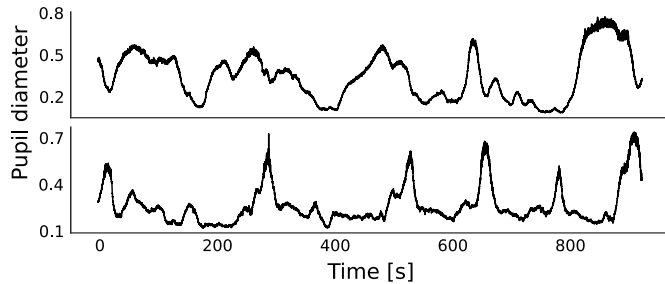

Cluster 3

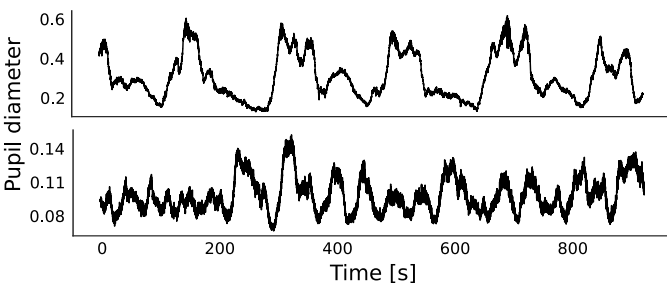

Cluster 4

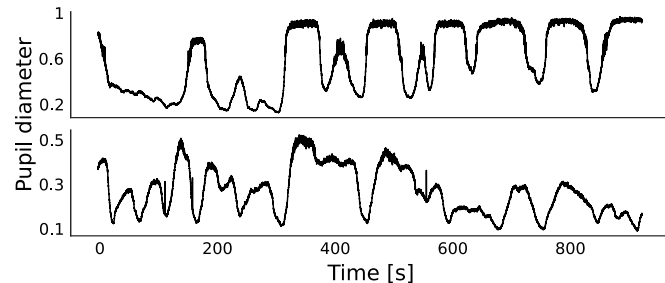

Supplement: supp [file elife-68980-supp-v1.zip]

A

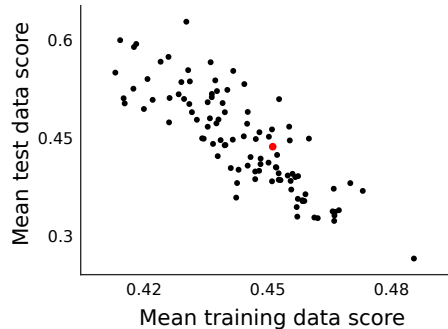

B

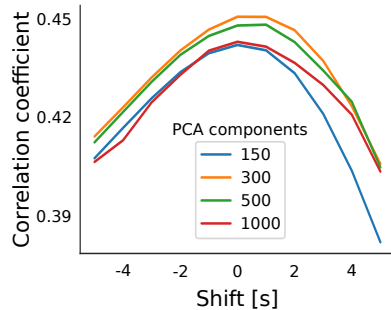

C

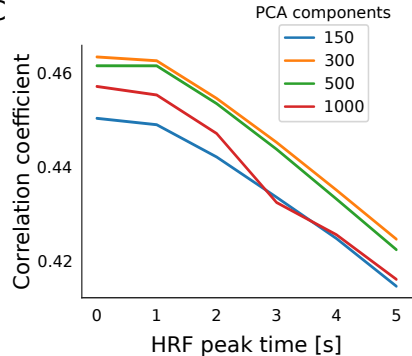

Supplement: supp [file elife-68980-supp-v1.zip]

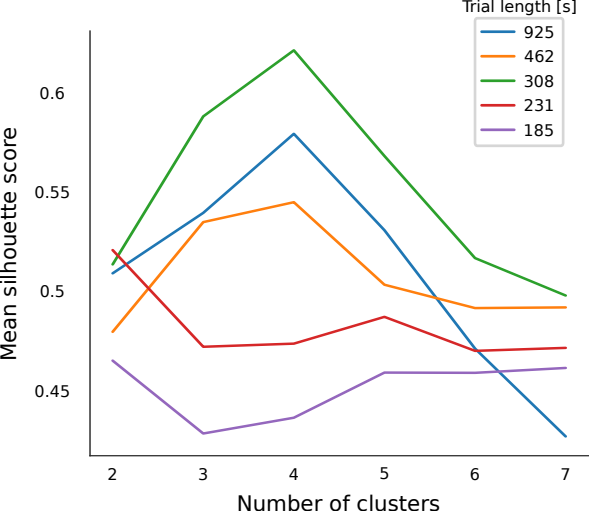

Supplement: supp [file elife-68980-supp-v1.zip]

GRU

linear regression

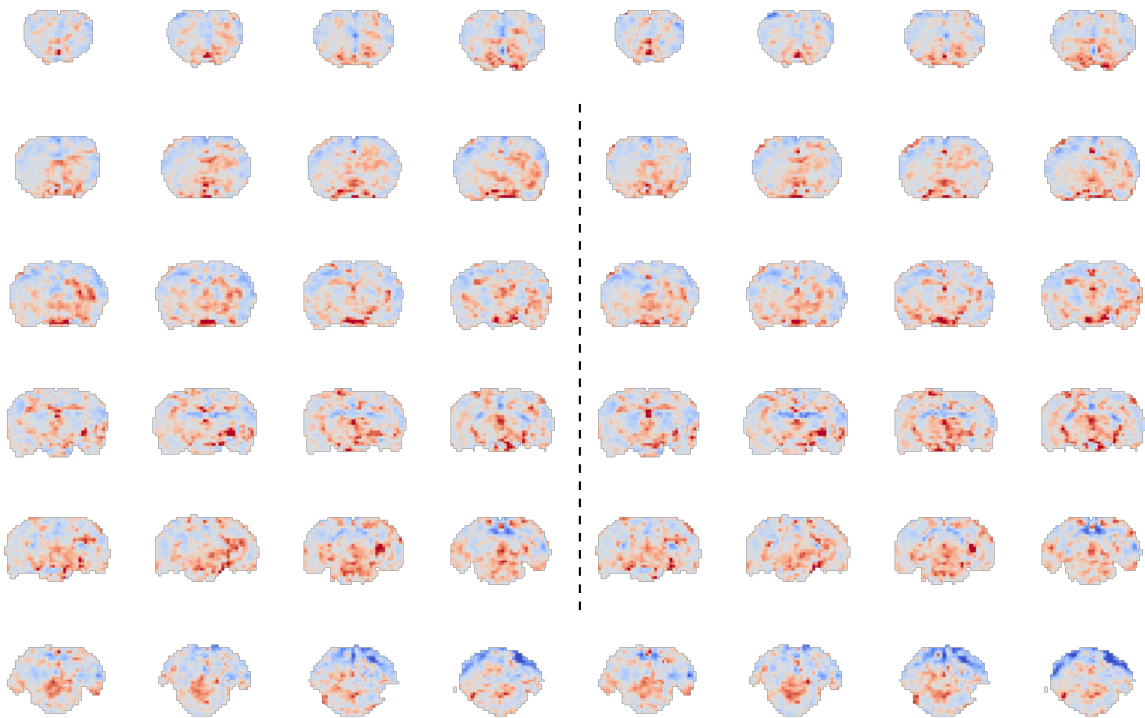

-2.6 0 1.0

normalized integrated gradients

-2.6 0 1.0

normalized integrated weights

Supplement: supp [file elife-68980-supp-v1.zip]

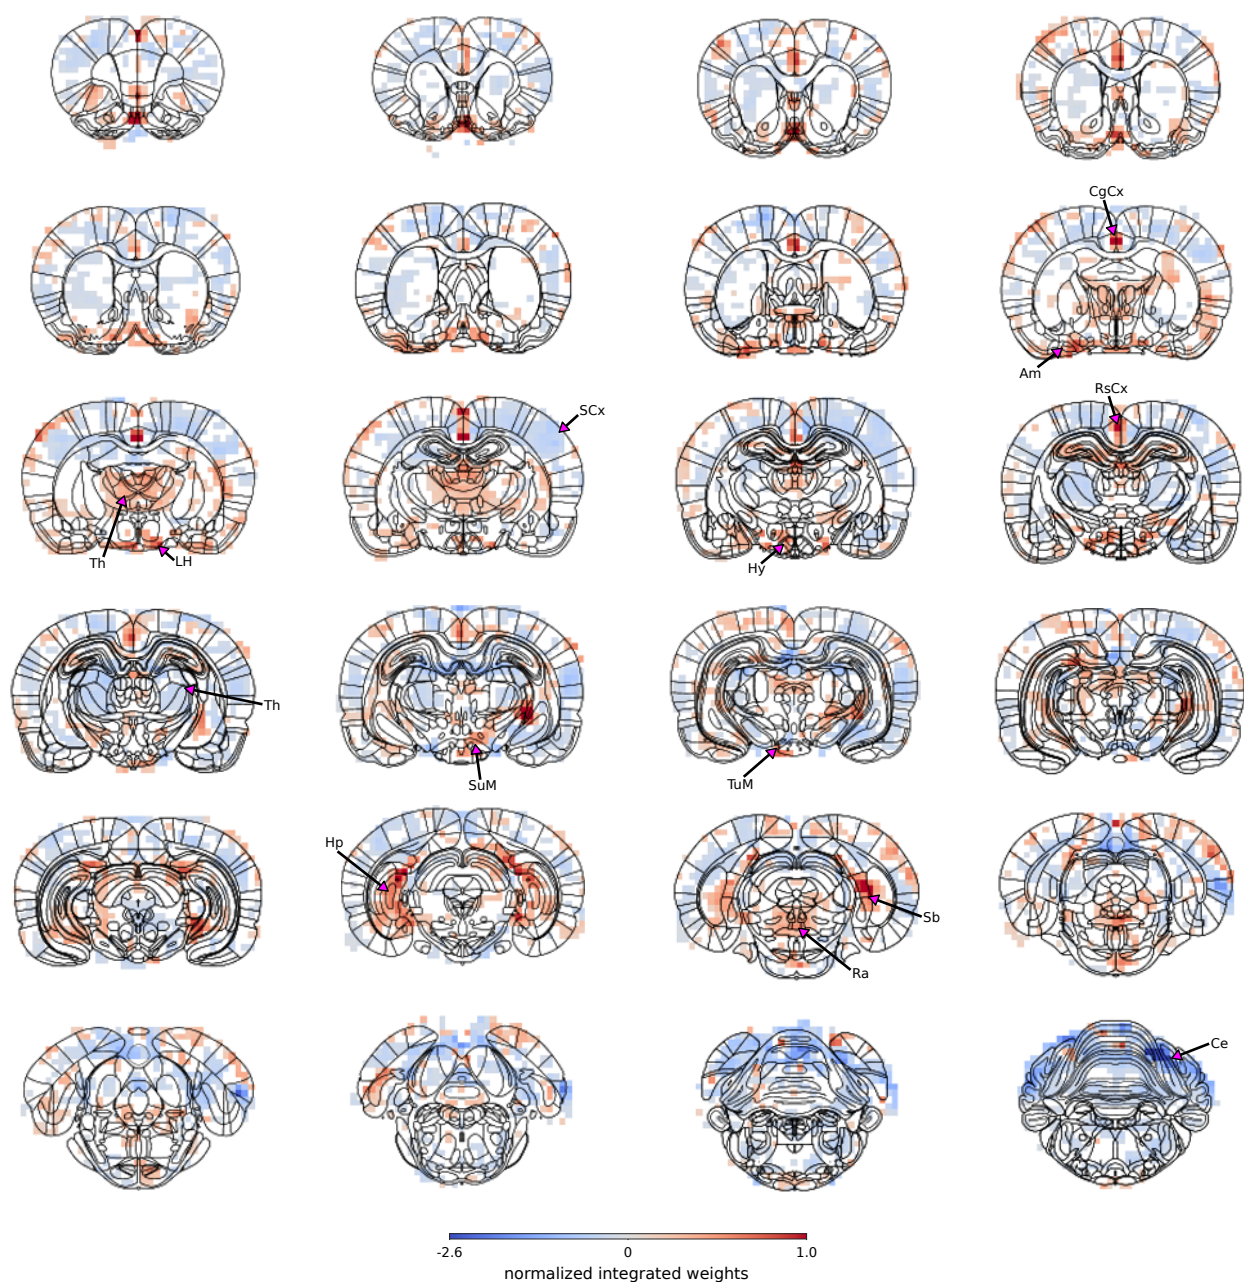

Supplement: supp [file elife-68980-supp-v1.zip]

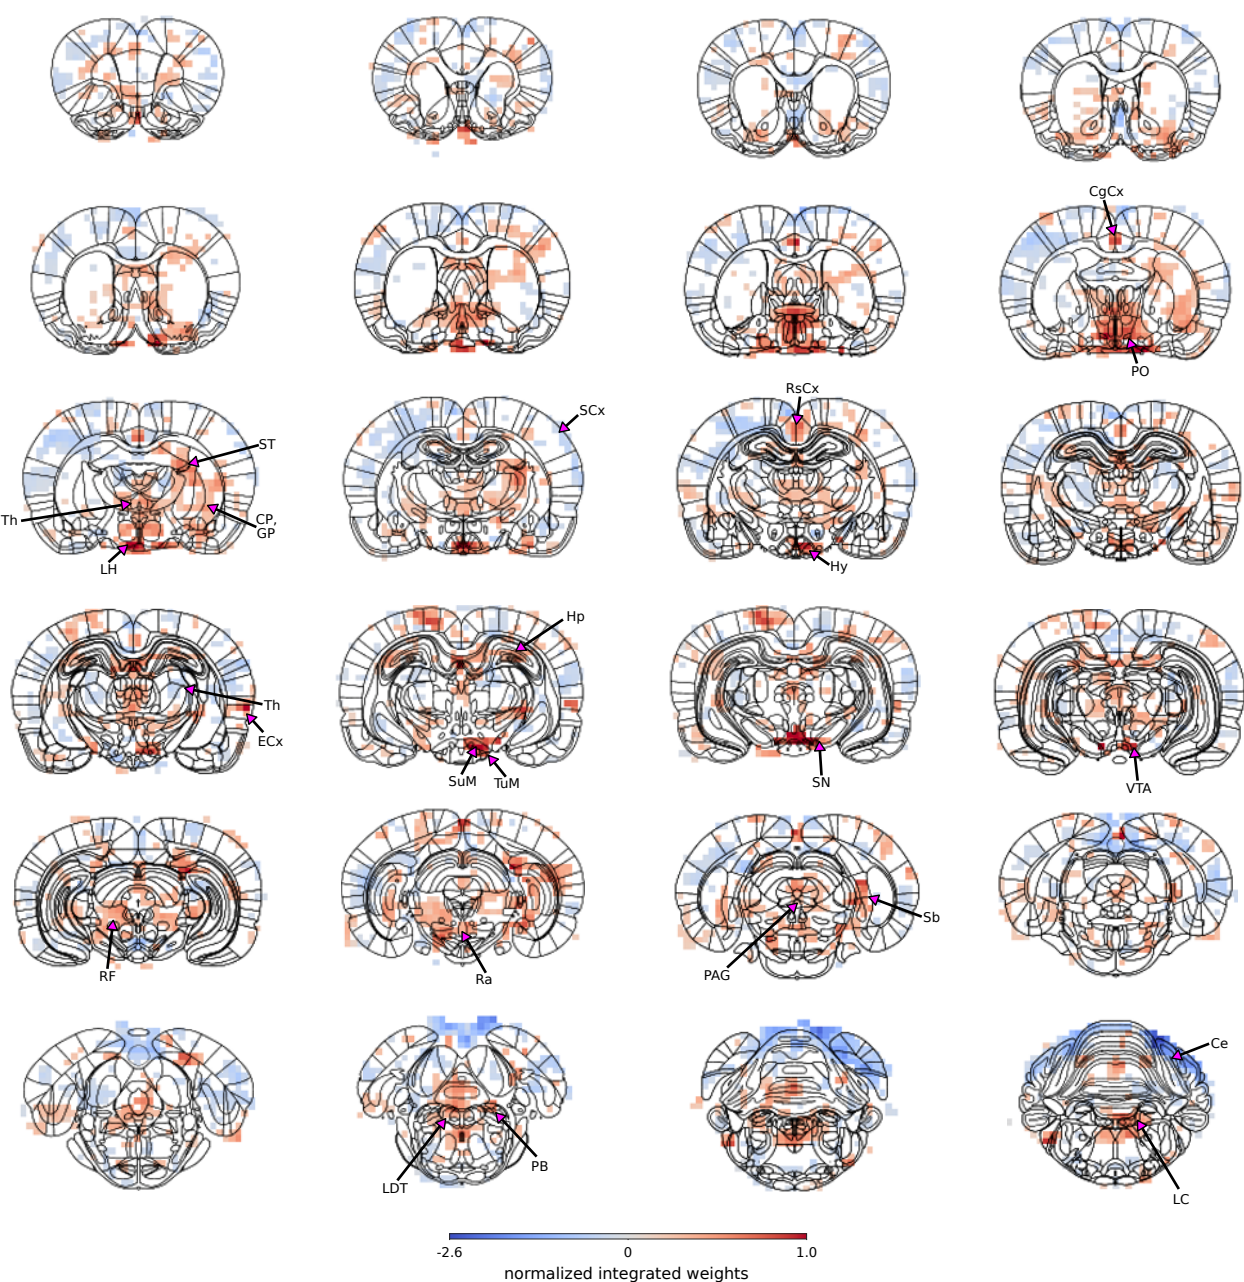

Supplement: supp [file elife-68980-supp-v1.zip]

**A**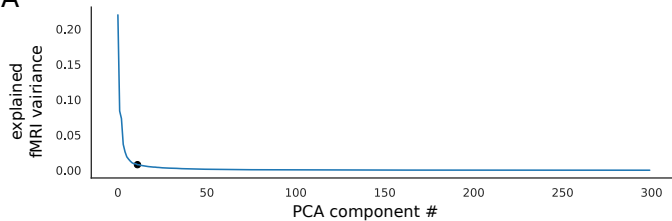**B**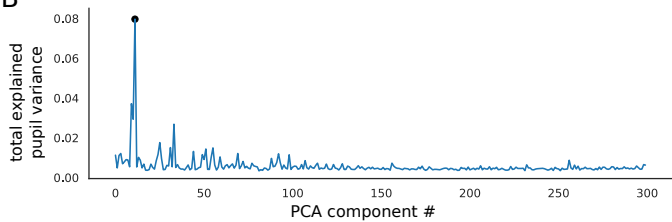**C**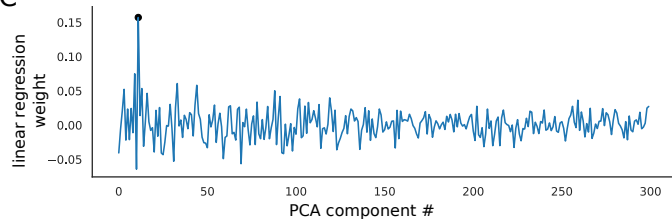

Supplement: supp [file elife-68980-supp-v1.zip]

A

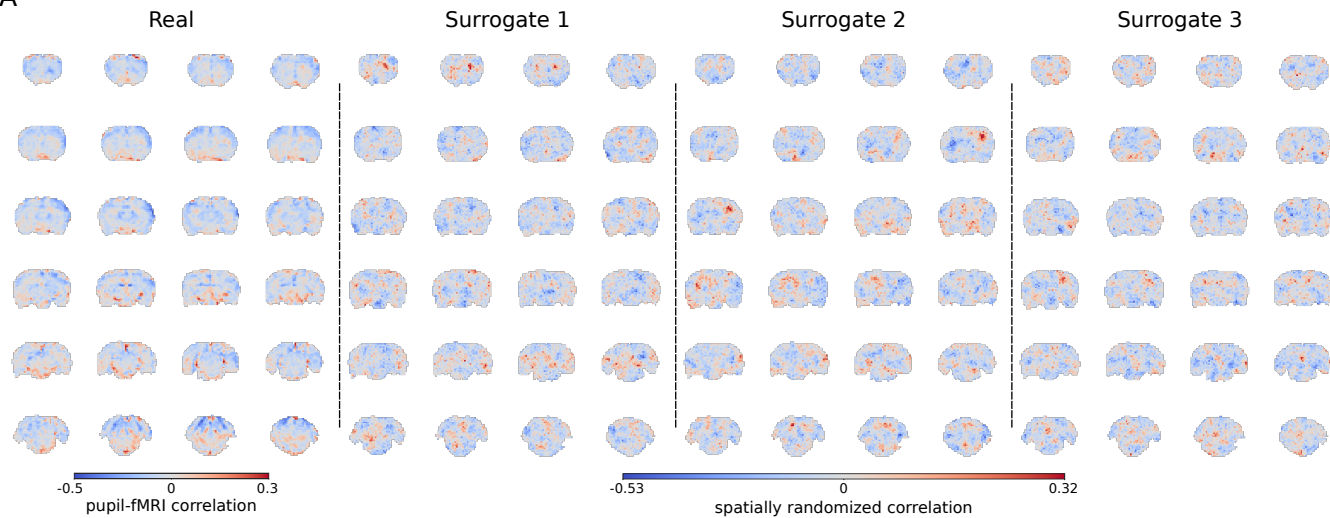

B

Mean label match ratio

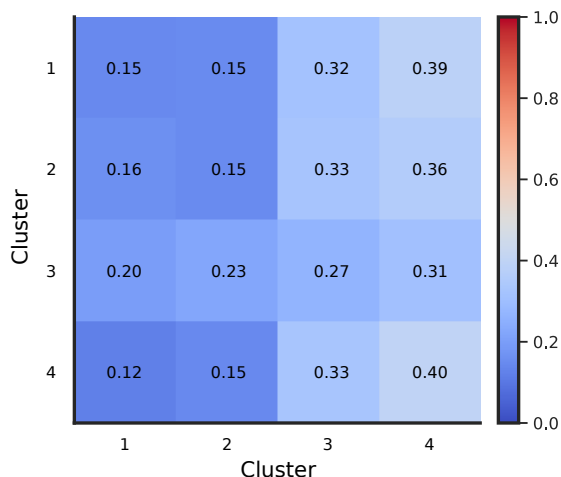

C

Mean map similarity

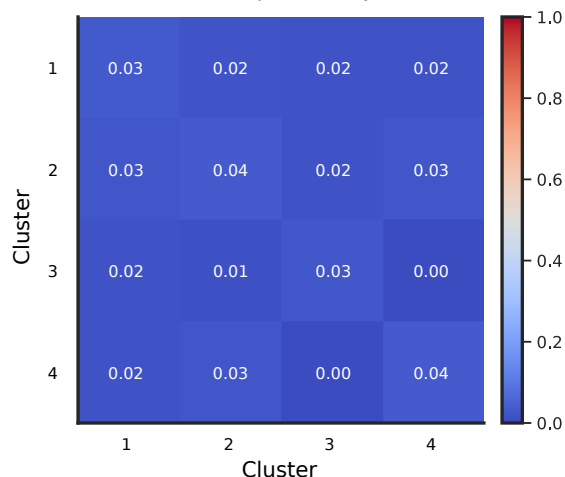

Supplement: supp [file elife-68980-supp-v1.zip]

A

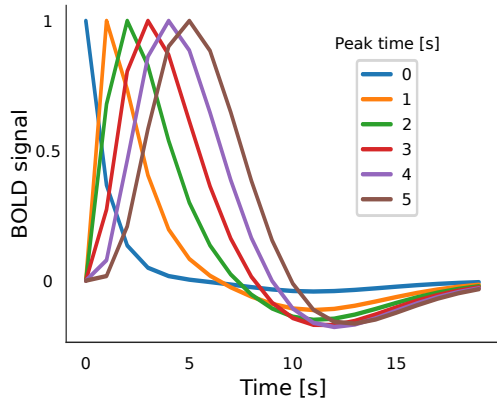

B

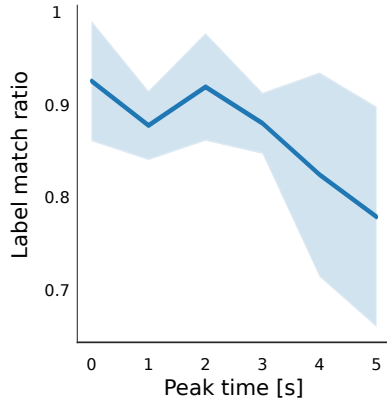

C

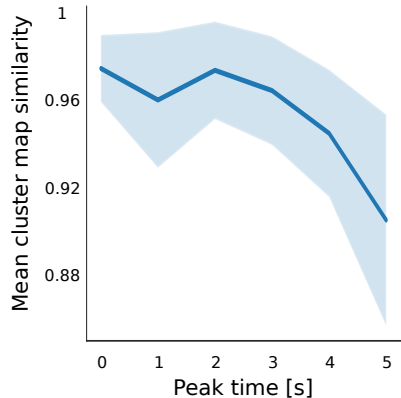

Supplement: supp [file elife-68980-supp-v1.zip]

A

Mean label match ratio

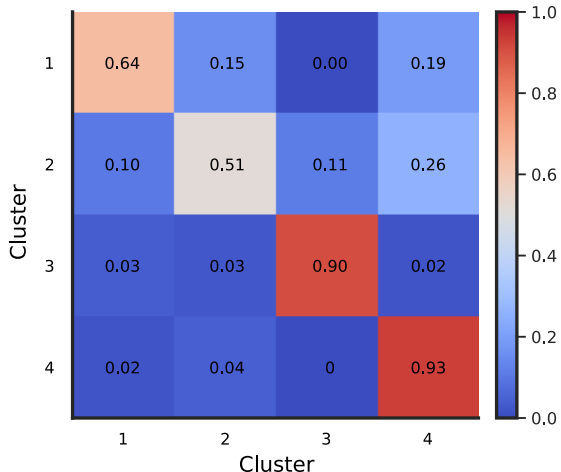

B

Mean map similarity

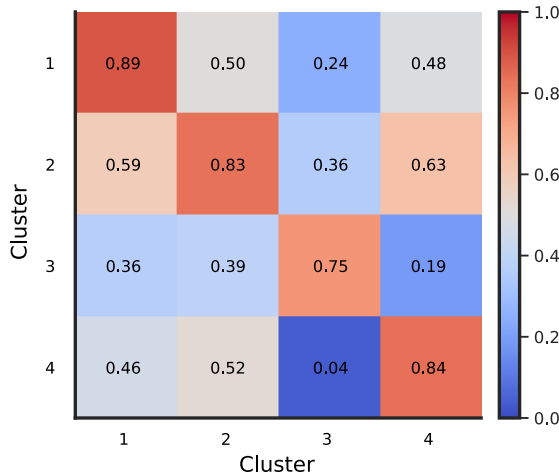

Supplement: supp [file elife-68980-supp-v1.zip]

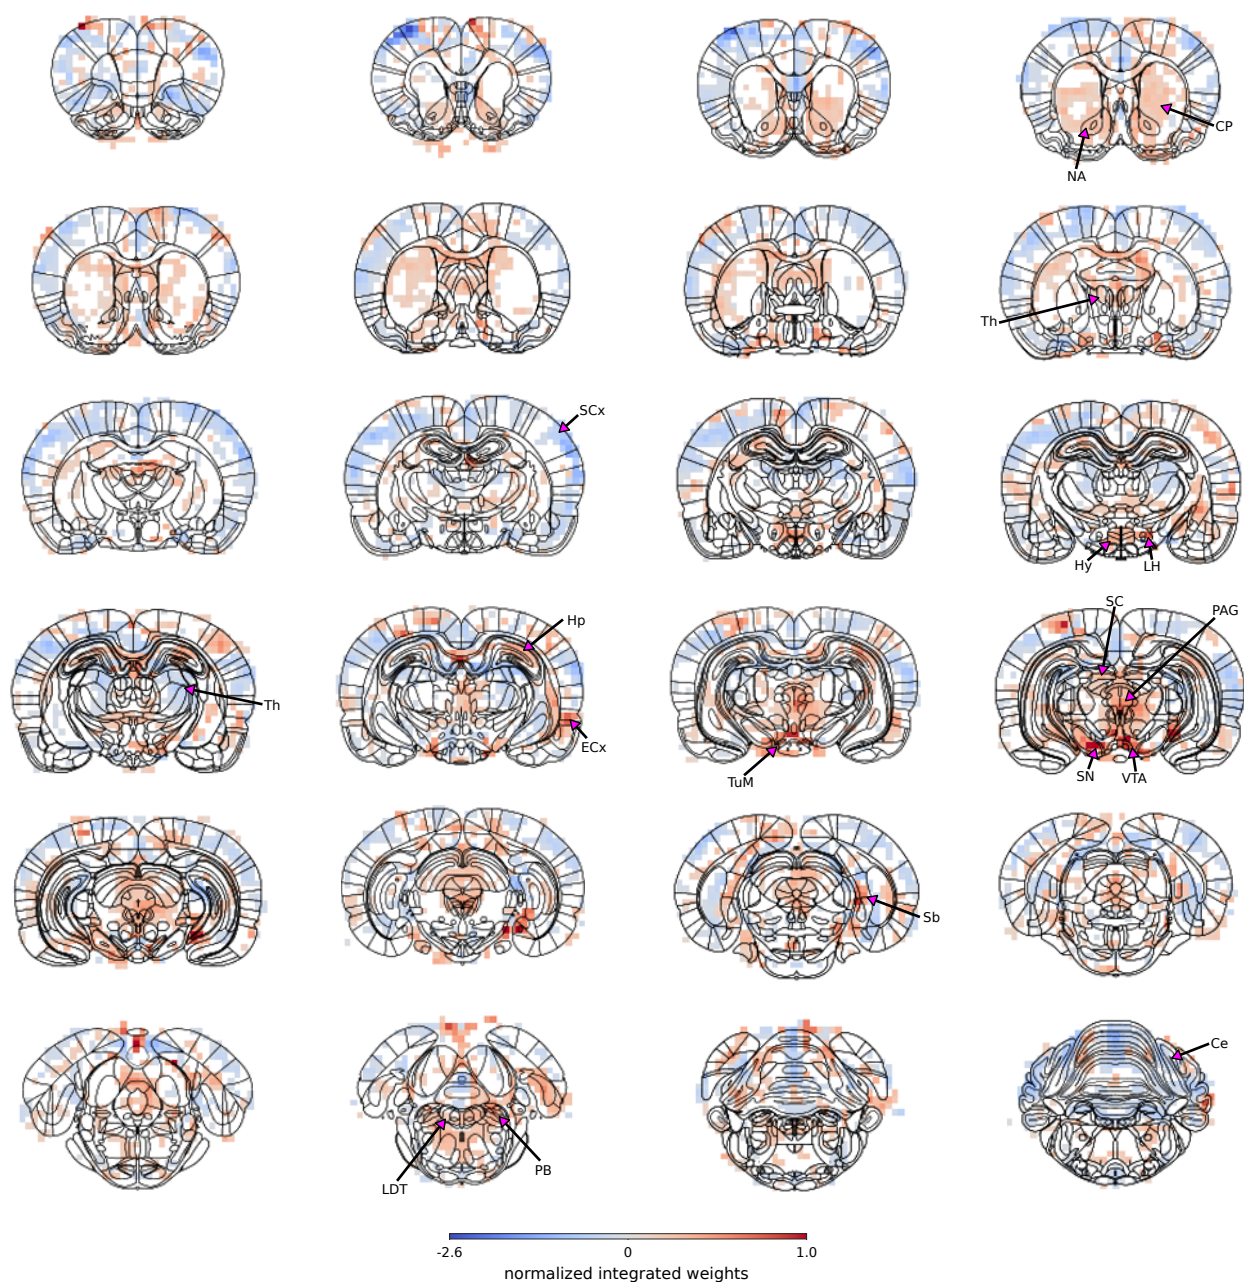

Supplement: supp [file elife-68980-supp-v1.zip]

A

Mean label match ratio

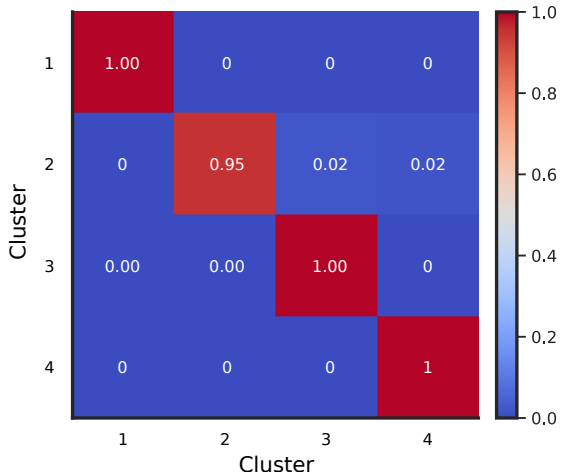

B

Mean map similarity

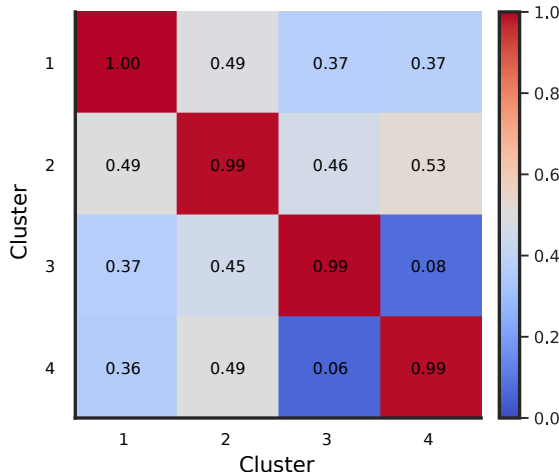

Supplement: supp [file elife-68980-supp-v1.zip]

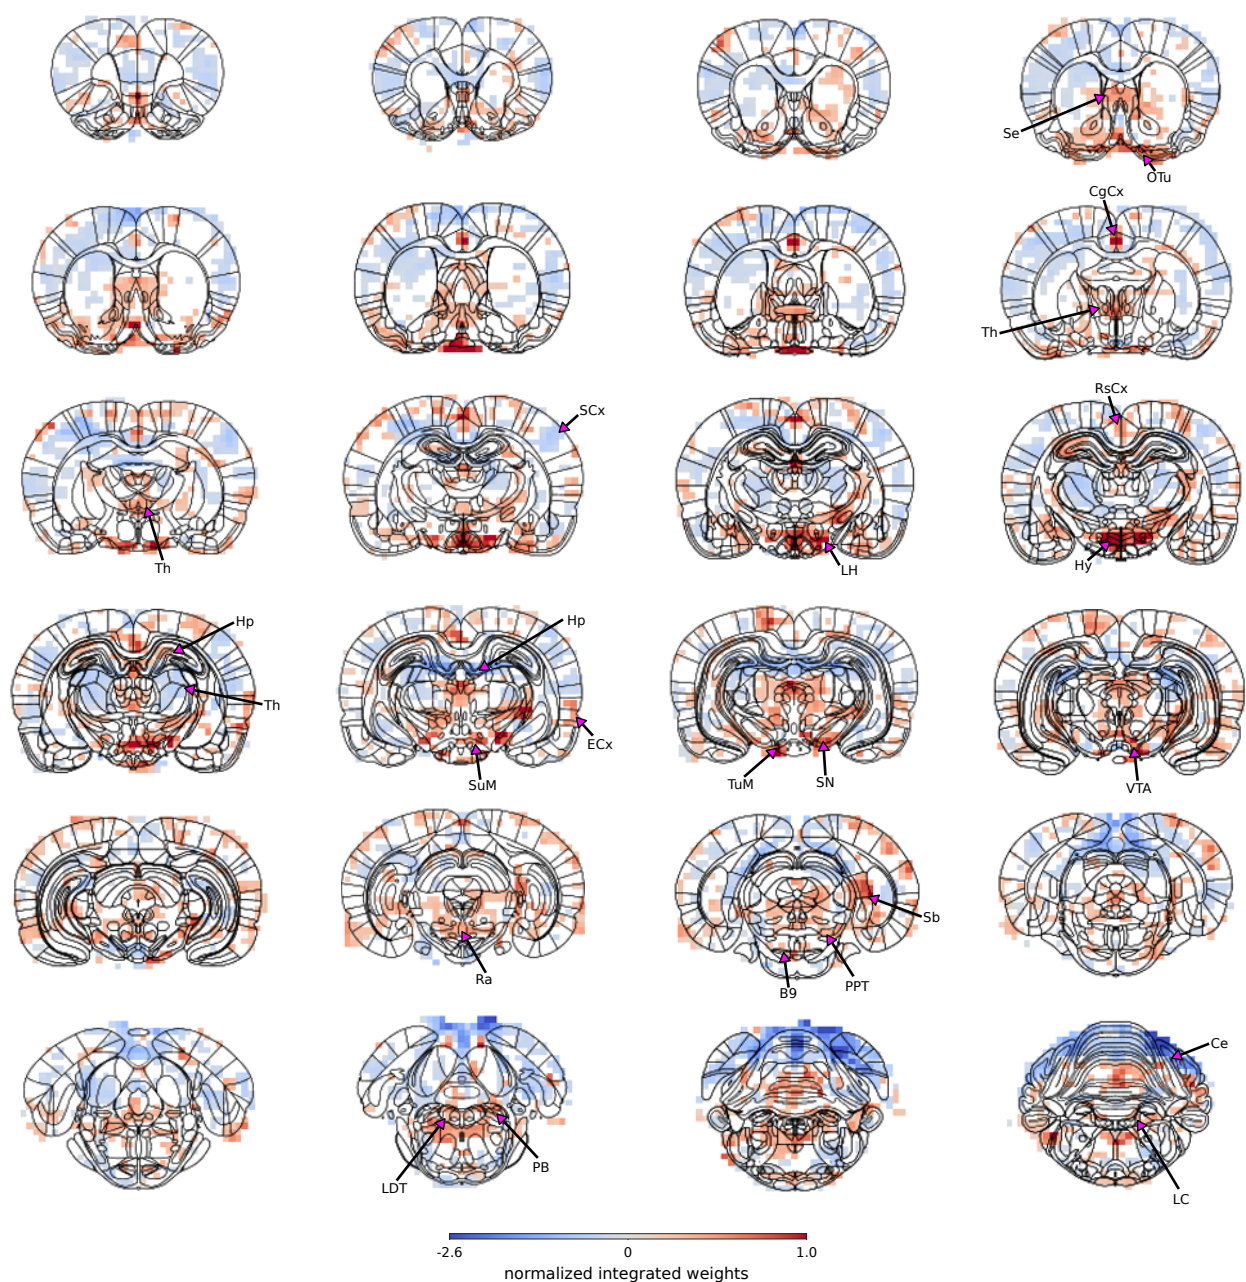

Supplement: supp [file elife-68980-supp-v1.zip]
